# Supplementary material for: Diagnostic Utility of SARS-CoV-2 Nucleocapsid Antigenemia: A Meta-analysis
Source: PubMed Central journal article supplement (PMC11487748; doi:10.1093/ofid/ofae561), 2024-10-02
Supplement: ofae561_supplementary_data.pdf [file ofae561_supplementary_data.pdf]

## Supplementary Information

|                                                                                                                         |    |
|-------------------------------------------------------------------------------------------------------------------------|----|
| Table S1. Pubmed search .....                                                                                           | 2  |
| Table S2. Scopus search.....                                                                                            | 3  |
| Table S3. Embase search .....                                                                                           | 4  |
| Table S4. Summary of source data. ....                                                                                  | 6  |
| Table S5. Cases included in variations on the acute COVID-19 meta-analysis. ....                                        | 7  |
| Table S6. Principles for risk of bias and applicability judgements based on the QUADAS-2 framework.....                 | 8  |
| Table S7. Studies meeting inclusion criteria without analyzable data.....                                               | 9  |
| Table S9. Sensitivity analysis of assay subgroups with $I^2 > 90\%$ for the meta-analysis using 2.97 pg/mL cutoff.....  | 11 |
| Table S10. Risk of bias and applicability assessment for studies included in each meta-analysis. ....                   | 12 |
| Figure S1. PRISMA flow chart.....                                                                                       | 13 |
| Figure S2. Schematic of reference standards used in meta-analyses .....                                                 | 14 |
| Figure S3. Alternate meta-analyses of sensitivity and specificity for acute COVID-19 .....                              | 16 |
| Figure S4. Alternate meta-analysis of nucleocapsid antigenemia as a diagnostic indicator of nasal swab viral load ..... | 18 |
| Figure S5. Omicron era nucleocapsid antigenemia has a similar distribution to early pandemic antigenemia. ....          | 19 |
| PRISMA 2020 Checklist.....                                                                                              | 20 |
| PRISMA 2020 for Abstracts Checklist .....                                                                               | 22 |
| Data extraction template .....                                                                                          | 24 |

| <b>Search number</b> | <b>Terms</b>                                                                               | <b>Filters</b>              | <b>Results 2/25/2023</b> | <b>Results 7/15/2023</b> |
|----------------------|--------------------------------------------------------------------------------------------|-----------------------------|--------------------------|--------------------------|
| 8                    | #5 AND #6                                                                                  | from 2019/12/1 - 3000/12/12 | 1,836                    | 2,079                    |
| 7                    | #5 AND #6                                                                                  |                             | 2,156                    | 2,399                    |
| 6                    | "sars-cov-2"[Title/Abstract] OR "coronavirus"[Title/Abstract] OR "covid"[Title/Abstract]   |                             | 341,114                  | 374,391                  |
| 5                    | #3 OR #4                                                                                   |                             | 152,352                  | 154,153                  |
| 4                    | antigenemia[Title/Abstract]                                                                |                             | 3,119                    | 3,132                    |
| 3                    | #1 AND #2                                                                                  |                             | 149,997                  | 151,788                  |
| 2                    | "nucleocapsid"[Title/Abstract] OR "n protein"[Title/Abstract] OR "antigen"[Title/Abstract] |                             | 511,597                  | 518,955                  |
| 1                    | "serum"[Title/Abstract] OR "blood"[Title/Abstract] OR "plasma"[Title/Abstract]             |                             | 3,730,554                | 3,789,211                |

**Table S1. Pubmed search**

| Search | Terms                                                                                                                                                                                                                                              | Results   | Results   |
|--------|----------------------------------------------------------------------------------------------------------------------------------------------------------------------------------------------------------------------------------------------------|-----------|-----------|
|        |                                                                                                                                                                                                                                                    | 2/25/2023 | 7/15/2023 |
| 9      | (( (TITLE-ABS ("serum" OR "blood" OR "plasma" )) AND (TITLE-ABS ("nucleocapsid" OR "n protein" OR "antigen" ))) OR (TITLE-ABS ("antigenemia" ))) AND (TITLE-ABS ("sars-cov-2" OR "coronavirus" OR "covid" )) AND PUBYEAR > 2018 AND PUBYEAR < 2024 | 2,182     | 2,483     |
| 8      | (( (TITLE-ABS ("serum" OR "blood" OR "plasma" )) AND (TITLE-ABS ("nucleocapsid" OR "n protein" OR "antigen" ))) OR (TITLE-ABS ("antigenemia" ))) AND (TITLE-ABS ("sars-cov-2" OR "coronavirus" OR "covid" ))                                       | 2,663     | 2,964     |
| 7      | (( (TITLE-ABS ("serum" OR "blood" OR "plasma" )) AND (TITLE-ABS ("nucleocapsid" OR "n protein" OR "antigen" ))) OR (TITLE-ABS ("antigenemia" ))) AND (TITLE-ABS ("sars-cov-2" OR "coronavirus" OR "covid" ))                                       | 2,663     | 2,964     |
| 6      | TITLE-ABS ("sars-cov-2" OR "coronavirus" OR "covid" )                                                                                                                                                                                              | 457,447   | 515,394   |
| 5      | (( (TITLE-ABS ("serum" OR "blood" OR "plasma" )) AND (TITLE-ABS ("nucleocapsid" OR "n protein" OR "antigen" ))) OR (TITLE-ABS ("antigenemia" )))                                                                                                   | 234,768   | 237,201   |
| 4      | TITLE-ABS ("antigenemia" )                                                                                                                                                                                                                         | 4,252     | 4,275     |
| 3      | (( (TITLE-ABS ("serum" OR "blood" OR "plasma" )) AND (TITLE-ABS ("nucleocapsid" OR "n protein" OR "antigen" )))                                                                                                                                    | 231,828   | 234,248   |
| 2      | TITLE-ABS ("nucleocapsid" OR "n protein" OR "antigen" )                                                                                                                                                                                            | 706,918   | 716,055   |
| 1      | TITLE-ABS ("serum" OR "blood" OR "plasma" )                                                                                                                                                                                                        | 5,020,091 | 5,102,642 |

**Table S2. Scopus search**

| Search | Terms                                                                                                      | Results   | Results   |
|--------|------------------------------------------------------------------------------------------------------------|-----------|-----------|
|        |                                                                                                            | 2/25/2023 | 7/15/2023 |
| #8     | #5 AND #6 AND [01-12-2019]/sd                                                                              | 2,448     | 2,856     |
| #7     | #5 AND #6                                                                                                  | 2,753     | 3,161     |
| #6     | 'sars-cov-2':ti OR 'coronavirus':ti OR 'covid':ti OR 'sars-cov-2':ab OR 'coronavirus':ab OR 'covid':ab     | 370,358   | 412,314   |
| #5     | #3 OR #4                                                                                                   | 202,879   | 205,911   |
| #4     | 'antigenemia':ti OR 'antigenemia':ab                                                                       | 4,097     | 4,121     |
| #3     | #1 AND #2                                                                                                  | 199,745   | 202,756   |
| #2     | 'nucleocapsid':ti OR 'n protein':ti OR 'antigen':ti OR 'nucleocapsid':ab OR 'n protein':ab OR 'antigen':ab | 630,640   | 641,358   |
| #1     | 'serum':ti OR 'blood':ti OR 'plasma':ti OR 'serum':ab OR 'blood':ab OR 'plasma':ab                         | 4,972,209 | 5,067,056 |

**Table S3. Embase search**

| Author    | Year  | Reference | Timing provided |           | Nucleocapsid measurements provided | Source data included in least-restrictive meta-analysis as... |          | Excluded from least-restrictive meta-analysis |                                                                                                                                                                                                                                                                                                                                                                                                                                                                            |
|-----------|-------|-----------|-----------------|-----------|------------------------------------|---------------------------------------------------------------|----------|-----------------------------------------------|----------------------------------------------------------------------------------------------------------------------------------------------------------------------------------------------------------------------------------------------------------------------------------------------------------------------------------------------------------------------------------------------------------------------------------------------------------------------------|
|           |       |           | Symptoms        | Diagnosis |                                    | Cases                                                         | Controls | Number                                        | Reason                                                                                                                                                                                                                                                                                                                                                                                                                                                                     |
|           |       |           | Blain           | 2022      |                                    | [11]                                                          | No       | No                                            | 56                                                                                                                                                                                                                                                                                                                                                                                                                                                                         |
| Damhorst  | 2023a | [12]      | Yes             | Yes       | 91                                 | 81                                                            | 0        | 10                                            | 10 controls were not verified to be SC2 negative and were excluded.                                                                                                                                                                                                                                                                                                                                                                                                        |
| Damhorst  | 2023b | [13]      | Yes             | Yes       | 54                                 | 30                                                            | 0        | 24                                            | Not all RT-PCR+ participants are considered acute COVID-19 in the manuscript. We have chosen to include only those within 14 days of symptom onset as acute cases in the meta-analysis. 24 participants had more than 14 days of symptoms.                                                                                                                                                                                                                                 |
| Favresse  | 2022  | [14]      | Yes             | Partial   | 243                                | 179                                                           | 0        | 64                                            | A subset of patients had serial measurements. 64 of these measurements were from more than 14 days after symptom onset.                                                                                                                                                                                                                                                                                                                                                    |
| Ogata     | 2020  | [15]      | No              | Partial   | 57                                 | 57                                                            | 0        | 0                                             | NA                                                                                                                                                                                                                                                                                                                                                                                                                                                                         |
| Parraud   | 2023  | [26]      | No              | Yes       | 59                                 | 42                                                            | 0        | 17                                            | Measurements up to 32 days after positive PCR were provided, those > 14 days were excluded.                                                                                                                                                                                                                                                                                                                                                                                |
| Perna     | 2021  | [16]      | No              | No        | 294                                | 233                                                           | 0        | 61                                            | Not stated whether controls had negative SC2 testing, therefore excluded 61 controls.                                                                                                                                                                                                                                                                                                                                                                                      |
| Saini     | 2023  | [17]      | Partial         | Partial   | 76                                 | 64                                                            | 12       | 0                                             | NA                                                                                                                                                                                                                                                                                                                                                                                                                                                                         |
| Shan      | 2021  | [10]      | No              | Yes       | 155                                | 102                                                           | 0        | 53                                            | Excluded 53 measurements provided in supplement that were more than 14 days from positive PCR.                                                                                                                                                                                                                                                                                                                                                                             |
| Sigal     | 2022  | [18]      | No              | Yes       | 36                                 | 36                                                            | 0        | 0                                             | NA                                                                                                                                                                                                                                                                                                                                                                                                                                                                         |
| Swank     | 2022  | [19]      | Partial         | No        | 160                                | 0                                                             | 0        | 160                                           | Study of PASC where most measurements occurred beyond 14 days of symptom onset. We did not include these data in the “least-restrictive” meta-analysis because the cohort was not explicitly defined as acute COVID-19 in the original study. However, we included the applicable patient-level data in the meta-analyses where cases were defined by time since symptom onset since the data were sufficient to satisfy the definition we established for these analyses. |
| Thudium   | 2021  | [20]      | Yes             | No        | 914                                | 341                                                           | 467      | 106                                           | Cases > 14 days since COVID-19 diagnosis were excluded due to a large number of late measurements.                                                                                                                                                                                                                                                                                                                                                                         |
| Verkerke  | 2021  | [21]      | Yes             | No        | 1221                               | 429                                                           | 0        | 792                                           | Measurements beyond 14 days since symptom onset were excluded due to large number of late measurements.                                                                                                                                                                                                                                                                                                                                                                    |
| Verkerke  | 2022  | [22]      | Yes             | Yes       | 354                                | 141                                                           | 194      | 19                                            | Excluded measurements are those from patients where paired Ct was available but timing from symptoms and from diagnosis were not available.                                                                                                                                                                                                                                                                                                                                |
| Veyrenche | 2022  | [23]      | Yes             | No        | 82                                 | 82                                                            | 0        | 0                                             | NA                                                                                                                                                                                                                                                                                                                                                                                                                                                                         |
| Wang      | 2021  | [24]      | Yes             | No        | 74                                 | 74                                                            | 0        | 0                                             | NA                                                                                                                                                                                                                                                                                                                                                                                                                                                                         |
| Wick      | 2022  | [25]      | Yes             | No        | 266                                | 266                                                           | 0        | 0                                             | NA                                                                                                                                                                                                                                                                                                                                                                                                                                                                         |

**Table S4. Summary of source data.**

This table reports how patient-level measurements provided by study authors were handled in our analysis. While some studies provided a single measurement per patient/participant, others provided multiple (serial) measurements for the same patient including measurements weeks after COVID-19 symptom onset. To avoid the inclusion of these late measurements and biasing of the meta-analysis with excess negative measurements, we imposed parameters on which measurements could be included in the “least restrictive” meta-analysis (the meta-analysis that accepts the author’s definition and does not universally restrict analysis to those with < 14 days of symptoms). Each study was handled on a case-by-case basis and an explanation is provided in the “Reason” column.

\*Time since diagnosis was not specifically requested from corresponding authors.

| First Author | Ref  | Pub year | Cases included in meta-analysis variations |                    |                   |                                  |                    |                   |                       | Controls in meta-analysis variations |                |             |
|--------------|------|----------|--------------------------------------------|--------------------|-------------------|----------------------------------|--------------------|-------------------|-----------------------|--------------------------------------|----------------|-------------|
|              |      |          | Author's index test cutoff                 |                    |                   | Index test cutoff 2.97-3.0 pg/mL |                    |                   | Data source           | Index test cutoff                    |                |             |
|              |      |          | Author's definition                        | ≤ 14 days symptoms | ≤ 7 days symptoms | Author's definition              | ≤ 14 days symptoms | ≤ 7 days symptoms |                       | Per author                           | 2.97-3.0 pg/mL | Data source |
| Ahava        | [27] | 2022     | 51                                         | 45                 | 26                | 51                               | 45                 | 26                | Table 1               | --                                   | --             | --          |
| Blain        | [11] | 2022     | 56                                         | --                 | --                | 56                               | --                 | --                | Source data           | --                                   | --             | --          |
| Chenane      | [28] | 2022     | 754                                        | 165                | 28                | 754                              | 165                | 28                | Abstract              | --                                   | --             | --          |
| Damhorst     | [12] | 2023     | 81                                         | 81                 | 55                | 81                               | 81                 | 55                | Source data           | --                                   | --             | --          |
| Damhorst     | [13] | 2023     | 30                                         | 30                 | 22                | 30                               | 30                 | 22                | Source data           | --                                   | --             | --          |
| Favresse     | [14] | 2022     | 179                                        | 179                | 114               | 179                              | 179                | 114               | Source data           | --                                   | --             | --          |
| Hingrat      | [29] | 2020     | 142                                        | 142                | 56                | 142                              | 142                | 56                | Figure 1              | --                                   | --             | --          |
| Jilg         | [30] | 2023     | 229                                        | 229                | --                | 229                              | 229                | --                | Abstract              | --                                   | --             | --          |
| Li           | [31] | 2020     | 50                                         | --                 | --                | --                               | --                 | --                | Table 1               | 633                                  | --             | Table 4     |
| Ogata        | [15] | 2020     | 57                                         | --                 | --                | 57                               | --                 | --                | Source data           | 17                                   | 17             | Figure 1    |
| Oueslati     | [32] | 2022     | 56                                         | --                 | --                | 56                               | --                 | --                | Text 3.3              | 42                                   | 42             | Text 3.3    |
| Parraud      | [26] | 2023     | 42                                         | 42                 | --                | 42                               | 42                 | --                | Source data           | --                                   | --             | --          |
| Perna        | [16] | 2021     | 233                                        | --                 | --                | 233                              | --                 | --                | Source data           | --                                   | --             | --          |
| Rogers       | [33] | 2022     | 2540                                       | 2540               | --                | 2540                             | 2540               | --                | Text p3               | --                                   | --             | --          |
| Saini        | [17] | 2023     | 64                                         | --                 | --                | 64                               | --                 | --                | Source data           | 12                                   | 12             | Source data |
| Shan         | [10] | 2021     | 102                                        | --                 | --                | 102                              | --                 | --                | Source/<br>Supplement | --                                   | --             | --          |
| Sigal        | [18] | 2022     | 36                                         | --                 | --                | 36                               | --                 | --                | Source data           | 43                                   | --             | Table 2     |
| Su           | [34] | 2021     | 39                                         | --                 | --                | --                               | --                 | --                | Text p2               | 50                                   | --             | Text p2     |
| Sullivan     | [35] | 2023     | 638                                        | --                 | --                | 638                              | --                 | --                | Abstract              | --                                   | --             | --          |
| Swank        | [19] | 2022     | --                                         | --                 | --                | --                               | 6                  | --                | Source data           | --                                   | --             | --          |
| Thudium      | [20] | 2021     | 341                                        | --                 | --                | 341                              | --                 | --                | Source data           | 467                                  | 467            | Source data |
| Verkerke     | [21] | 2021     | 429                                        | 429                | 135               | 429                              | 429                | 135               | Source data           | --                                   | --             | --          |
| Verkerke     | [22] | 2022     | 141                                        | 141                | 69                | 141                              | 141                | 69                | Source data           | 194                                  | 194            | Source data |
| Veyrenche    | [23] | 2022     | 82                                         | 58                 | 16                | 82                               | 58                 | 16                | Source data           | --                                   | --             | --          |
| Wang         | [24] | 2021     | 74                                         | 70                 | 40                | 74                               | 70                 | 40                | Source data           | 52                                   | --             | Text p5     |
| Wick         | [25] | 2022     | 266                                        | 217                | 105               | 266                              | 217                | 105               | Source data           | --                                   | --             | --          |
| Yonker       | [36] | 2021     | 22                                         | --                 | --                | --                               | --                 | --                | Figure 1              | --                                   | --             | --          |
| Zhang        | [37] | 2021     | 177                                        | 170                | 143               | 177                              | 170                | 143               | Figure 1              | 60                                   | 60             | Table 1     |
| Zhang        | [38] | 2022     | 140                                        | 127                | 59                | --                               | --                 | --                | Table 2               | --                                   | --             | --          |

**Table S5. Cases included in variations on the acute COVID-19 meta-analysis.**

| Domain                                                                                  | Risk of bias characteristics                                                    |                                                                                                                                          | Applicability concern                                      |                                                               |
|-----------------------------------------------------------------------------------------|---------------------------------------------------------------------------------|------------------------------------------------------------------------------------------------------------------------------------------|------------------------------------------------------------|---------------------------------------------------------------|
|                                                                                         | Low                                                                             | High                                                                                                                                     | Low                                                        | High                                                          |
| <b><i>Sensitivity of antigenemia for acute COVID-19</i></b>                             |                                                                                 |                                                                                                                                          |                                                            |                                                               |
| <b>Patient selection</b>                                                                | Consecutive or random enrollment                                                | Convenience sampling, secondary specimen analysis, sampling from a broader cohort where not all participants had blood samples available | Study performed since the emergence of the omicron variant | Study performed prior to the emergence of the omicron variant |
| <b>Index test</b>                                                                       | Cutoff value 2.97–3.0 pg/mL                                                     | Cutoff value other than 2.97–3.0 pg/mL                                                                                                   | Commercially available assay                               | Lab-developed assays                                          |
| <b>Reference standard</b>                                                               | Cases defined by positive respiratory RT-PCR <i>and</i> time from symptom onset | Timing not provided or based on time from positive RT-PCR only                                                                           | --                                                         | --                                                            |
| <b>Flow and timing</b>                                                                  | --                                                                              | --                                                                                                                                       | --                                                         | --                                                            |
| <b><i>Diagnostic accuracy of antigenemia with respect to respiratory viral load</i></b> |                                                                                 |                                                                                                                                          |                                                            |                                                               |
| <b>Patient selection</b>                                                                | Consecutive or random enrollment                                                | Convenience sampling, secondary specimen analysis, sampling from a broader cohort where not all participants had blood samples available | Study performed since the emergence of the omicron variant | Study performed prior to the emergence of the omicron variant |
| <b>Index test</b>                                                                       | Cutoff value 2.97–3.0 pg/mL                                                     | Cutoff value other than 2.97–3.0 pg/mL                                                                                                   | Commercially available assay                               | Home-brew assays                                              |
| <b>Reference standard</b>                                                               | One RT-PCR assay and sample type used                                           | Multiple RT-PCR assays or sample types used                                                                                              | --                                                         | --                                                            |
| <b>Flow and timing</b>                                                                  | RT-PCR performed within 24 hours of blood sample collection                     | <i>Not applicable</i>                                                                                                                    | --                                                         | --                                                            |

**Table S6. Principles for risk of bias and applicability judgements based on the QUADAS-2 framework.**



| <b>First Author</b> | <b>Ref</b> | <b>Pub year</b> | <b>Location</b>   | <b>Start date</b> | <b>End date</b> | <b>Assay</b>               |
|---------------------|------------|-----------------|-------------------|-------------------|-----------------|----------------------------|
| Brasen              | [42]       | 2021            | Denmark           | 3/30/2020         | 9/15/2020       | Quanterix Simoa            |
| Brasen              | [43]       | 2023            | Denmark           | NR                | NR              | Quanterix Simoa            |
| Epling              | [44]       | 2023            | Bethesda, MD      | 12/1/2021         | 5/31/2022       | Quanterix Simoa            |
| Kristiansen         | [45]       | 2022            | Denmark           | 11/1/2021         | 11/30/2021      | Solsten ELISA              |
| Lebedin             | [46]       | 2021            | Moscow, Russia    | NR                | NR              | Hyttest Ltd sandwich assay |
| Liang               | [47]       | 2021            | China             | NR                | NR              | ELISA                      |
| Liu                 | [47]       | 2021            | China             | NR                | NR              | ELISA                      |
| Mathur              | [48]       | 2022            | San Francisco, CA | 9/1/2020          | 4/13/2021       | Quanterix Simoa            |
| Matthay             | [49]       | 2023            | San Francisco, CA | 6/1/2020          | 3/31/2021       | Quanterix Simoa            |
| Neumann             | [50]       | 2021            | NR                | NR                | NR              | NR                         |
| Peluso              | [51]       | 2023            | USA               | NR                | NR              | NR                         |
| Peluso              | [52]       | 2023            | USA               | NR                | NR              | Quanterix Simoa            |
| Rouka               | [53]       | 2021            | Larissa, Greece   | NR                | NR              | Prognosis Biotech          |
| Wu                  | [54]       | 2022            | China             | NR                | NR              | ELISA                      |

**Table S7. Studies meeting inclusion criteria without analyzable data** (could not be extracted and source data not provided)

| <b>Study</b>     | <b>Reference</b> | <b>Gene target(s)</b> |
|------------------|------------------|-----------------------|
| Ahava 2022       | [27]             | Multiple              |
| Hingrat 2020     | [29]             | E gene                |
| Sigal 2022       | [18]             | N1 and N2 (averaged)  |
| Wang 2021        | [24]             | Multiple              |
| Zhang 2021       | [37]             | RdRp and N genes      |
| Damhorst 2023b   | [13]             | N2                    |
| Favresse 2022A/C | [40]             | N2 and E              |
| Verkerke 2022    | [22]             | Multiple              |
| Oueslati 2022    | [32]             | Multiple              |
| Veyrenche 2022   | [23]             | E, N and RdRP         |

**Table S8. Summary of gene targets used in the Ct value-based meta-analysis.**

When not explicitly stated, the gene targets were determined based on package insert for the assay listed in each manuscript.

| Sensitivity meta-analysis subgroup             | Action                                | I <sup>2</sup> (95% CI) | Subgroup Sensitivity (95% CI)      | Overall Sensitivity (95% CI) |
|------------------------------------------------|---------------------------------------|-------------------------|------------------------------------|------------------------------|
| <b>Author's definition (other assays)</b>      | <b>No change</b>                      | <b>96% (94 – 98%)</b>   | <b>0.885 (0.779 – 0.944)</b>       | <b>0.793 (0.716 – 0.853)</b> |
|                                                | Removal of Perna 2021                 | 74% (41 – 89%)          | 0.919 (0.871 – 0.950)              | 0.803 (0.727 – 0.861)        |
| <b>Author's definition (Quanterix simoa)</b>   | <b>No change</b>                      | <b>97% (97 – 98%)</b>   | <b>0.774 (0.663 – 0.856)</b>       | <b>0.793 (0.716 – 0.853)</b> |
|                                                | Removal of Saini 2023                 | 97% (97 – 98%)          | 0.800 (0.705 – 0.870)              | 0.805 (0.734 – 0.862)        |
|                                                | Removal of Rogers 2022                | 95% (93 – 96%)          | 0.745 (0.638 – 0.829)              | 0.780 (0.702 – 0.843)        |
|                                                | Removal of Saini 2023 and Rogers 2022 | 94% (91 – 96%)          | 0.773 (0.683 – 0.844)              | 0.793 (0.720 – 0.851)        |
| <b>&lt;=14 days symptoms (Quanterix simoa)</b> | <b>No change</b>                      | <b>98% (97 – 98%)</b>   | <b>0.773 (0.620 – 0.877)</b>       | <b>0.830 (0.745 – 0.891)</b> |
|                                                | Removal of Swank 2022                 | 98% (97 – 98%)          | 0.810 (0.690 – 0.890) <sub>s</sub> | 0.846 (0.776 – 0.898)        |

**Table S9. Sensitivity analysis of assay subgroups with I<sup>2</sup> > 90% for the meta-analysis using 2.97 pg/mL cutoff.**

The meta-sensitivity was recalculated for each subgroup with I<sup>2</sup> > 90% after removal of one or two apparent outliers. I<sup>2</sup> fell below 90% with the removal of a single outlier from the “other assays” subgroup for the “author’s definition” sensitivity meta-analysis and raised the sensitivity estimate for that subgroup although 95% CI still overlapped substantially. In the “Quanterix simoa” subgroups, which included more studies, removal of outliers had a less pronounced effect on I<sup>2</sup> and sensitivity estimates remained overall similar. This exercise highlights the high heterogeneity of the source studies in this meta-analysis, but did not substantially alter overall sensitivity estimates – the largest change in overall sensitivity was +0.016.

| Author    | Year | Ref  | Risk of bias:              |            |                    | Risk of bias:                     |            |                    | Applicability concerns: |            |
|-----------|------|------|----------------------------|------------|--------------------|-----------------------------------|------------|--------------------|-------------------------|------------|
|           |      |      | Acute COVID-19 sensitivity |            |                    | Viral load diagnostic performance |            |                    | Both meta-analyses      |            |
|           |      |      | Patient selection          | Index test | Reference standard | Patient selection                 | Index test | Reference standard | Patient selection       | Index test |
| Ahava     | 2022 | [27] | ☹                          | 😊          | 😊                  | ☹                                 | 😊          | ?                  | ☹                       | ?          |
| Blain     | 2022 | [11] | 😊                          | 😊          | ☹                  | --                                | --         | --                 | ☹                       | ?          |
| Chenane   | 2022 | [28] | ☹                          | 😊          | 😊                  | --                                | --         | --                 | ☹                       | ?          |
| Damhorst  | 2023 | [12] | ☹                          | 😊          | 😊                  | --                                | --         | --                 | ☹                       | 😊          |
| Damhorst  | 2023 | [13] | ☹                          | 😊          | 😊                  | ☹                                 | 😊          | 😊                  | 😊                       | 😊          |
| Favresse  | 2022 | [14] | ☹                          | 😊          | 😊                  | ☹                                 | 😊          | ☹                  | ?                       | 😊          |
| Hingrat   | 2020 | [29] | ☹                          | 😊          | 😊                  | ☹                                 | 😊          | ☹                  | ☹                       | ?          |
| Jilg      | 2023 | [30] | ?                          | 😊          | 😊                  | --                                | --         | --                 | ☹                       | 😊          |
| Li        | 2020 | [31] | ?                          | ☹          | ☹                  | --                                | --         | --                 | ?                       | ?          |
| Ogata     | 2020 | [15] | ?                          | 😊          | ☹                  | --                                | --         | --                 | ☹                       | 😊          |
| Oueslati  | 2022 | [32] | ?                          | 😊          | ☹                  | ?                                 | 😊          | ☹                  | ☹                       | ?          |
| Parraud   | 2023 | [26] | ☹                          | 😊          | 😊                  | --                                | --         | --                 | ☹                       | ?          |
| Perna     | 2021 | [16] | ?                          | 😊          | ☹                  | --                                | --         | --                 | ?                       | 😊          |
| Rogers    | 2022 | [33] | 😊                          | 😊          | 😊                  | --                                | --         | --                 | ☹                       | 😊          |
| Saini     | 2023 | [17] | ?                          | 😊          | ☹                  | --                                | --         | --                 | ?                       | 😊          |
| Shan      | 2021 | [10] | ?                          | 😊          | ☹                  | --                                | --         | --                 | ☹                       | 😊          |
| Sigal     | 2022 | [18] | ?                          | 😊          | ☹                  | ?                                 | 😊          | 😊                  | ☹                       | 😊          |
| Su        | 2021 | [34] | ?                          | ☹          | ☹                  | --                                | --         | --                 | ?                       | 😊          |
| Sullivan  | 2023 | [35] | ☹                          | 😊          | ☹                  | --                                | --         | --                 | ☹                       | 😊          |
| Swank     | 2022 | [19] | ☹                          | 😊          | 😊                  | --                                | --         | --                 | ?                       | 😊          |
| Thudium   | 2021 | [20] | ?                          | 😊          | ☹                  | --                                | --         | --                 | ☹                       | 😊          |
| Verkerke  | 2021 | [21] | ☹                          | 😊          | 😊                  | --                                | --         | --                 | ☹                       | 😊          |
| Verkerke  | 2022 | [22] | ☹                          | 😊          | 😊                  | ☹                                 | 😊          | ☹                  | ☹                       | 😊          |
| Veyrenche | 2022 | [23] | ?                          | 😊          | 😊                  | ?                                 | 😊          | 😊                  | ☹                       | ?          |
| Wang      | 2021 | [24] | ☹                          | 😊          | 😊                  | ☹                                 | 😊          | ☹                  | ☹                       | 😊          |
| Wick      | 2022 | [25] | ☹                          | 😊          | 😊                  | --                                | --         | --                 | ☹                       | 😊          |
| Yonker    | 2021 | [36] | ?                          | ☹          | ☹                  | --                                | --         | --                 | ?                       | 😊          |
| Zhang     | 2021 | [37] | ?                          | 😊          | 😊                  | ?                                 | 😊          | ☹                  | ☹                       | ?          |
| Zhang     | 2022 | [38] | ☹                          | ☹          | 😊                  | --                                | --         | --                 | ☹                       | ?          |

**Table S10. Risk of bias and applicability assessment for studies included in each meta-analysis.**

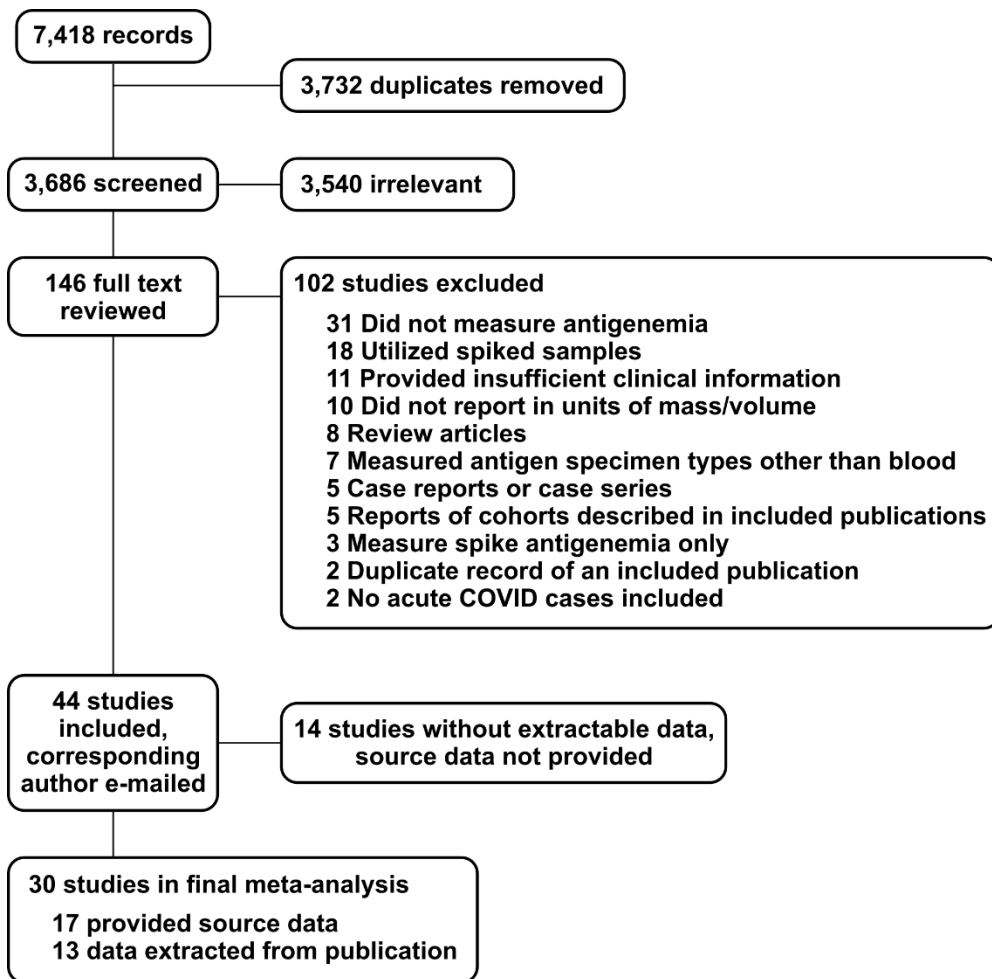

**Figure S1. PRISMA flow chart**

**Primary meta-analyses**  
Index test cutoff 2.97\* pg/mL

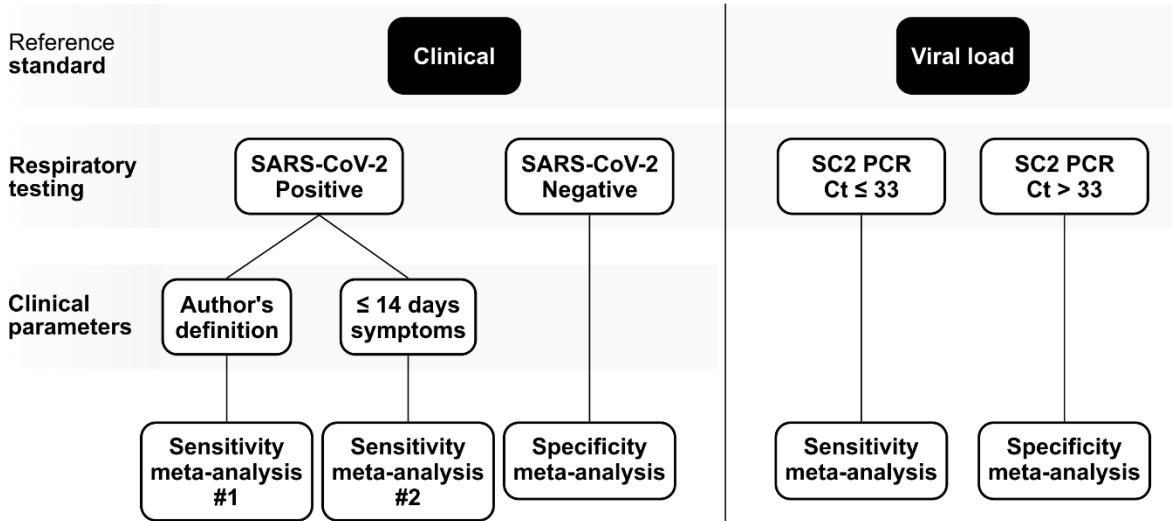

\*Cutoff of 2.97 pg/mL was used whenever source data available; published studies with cutoffs of 2.98–3.0 were also included

**Figure S2. Schematic of reference standards used in meta-analyses**

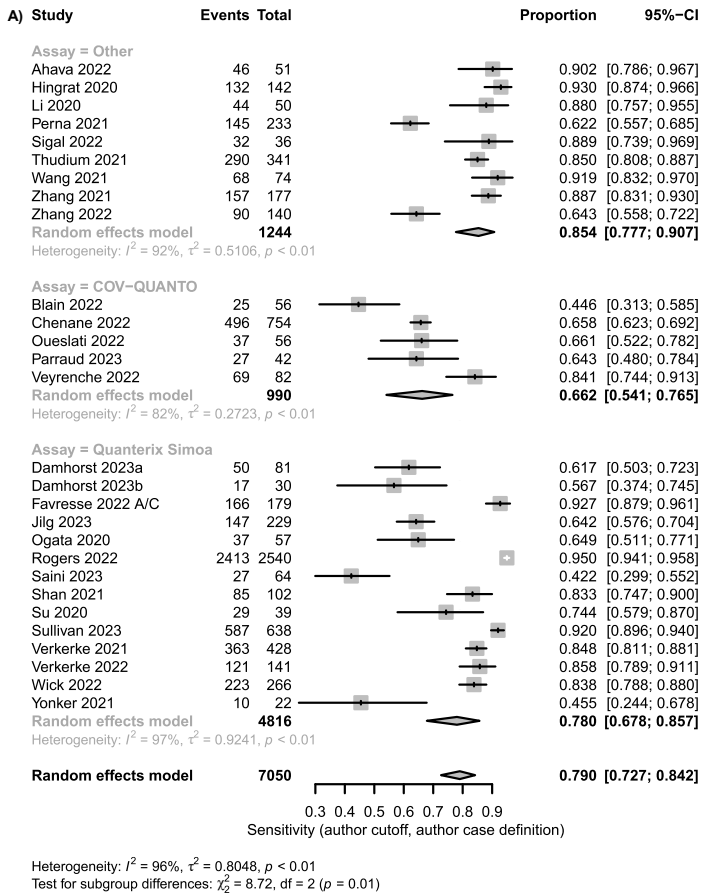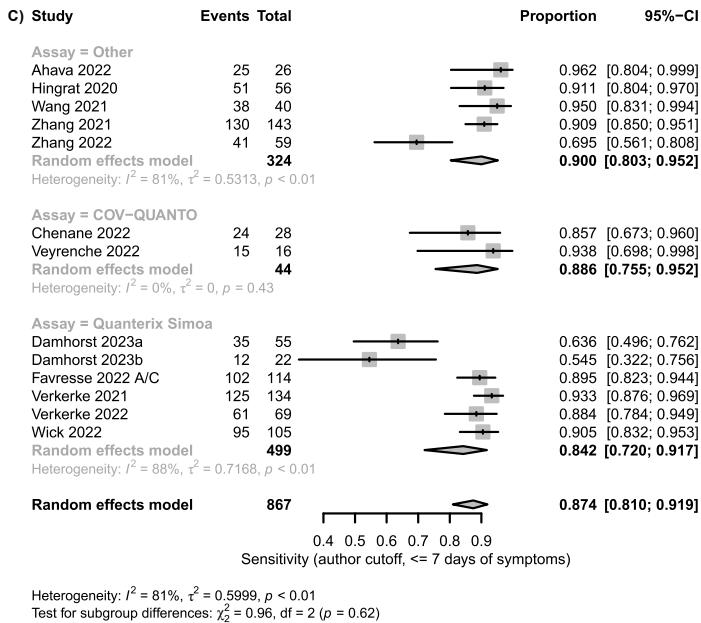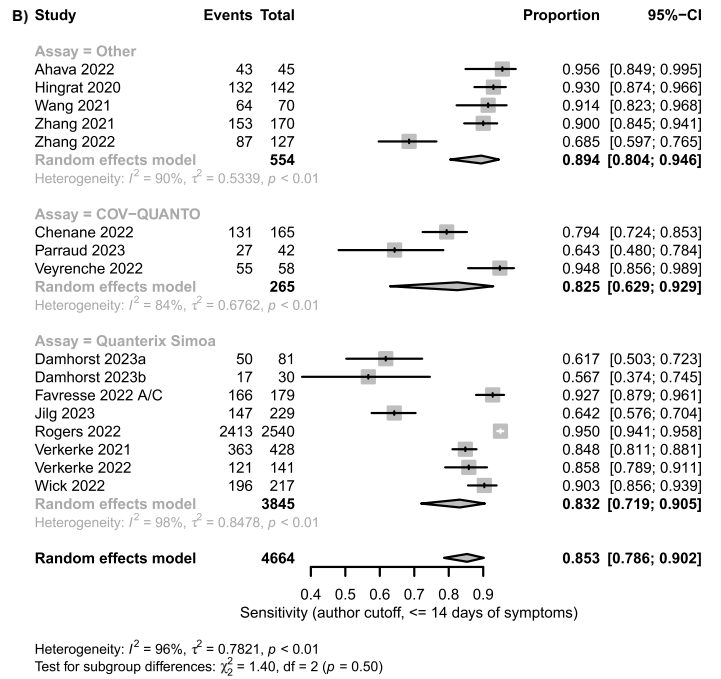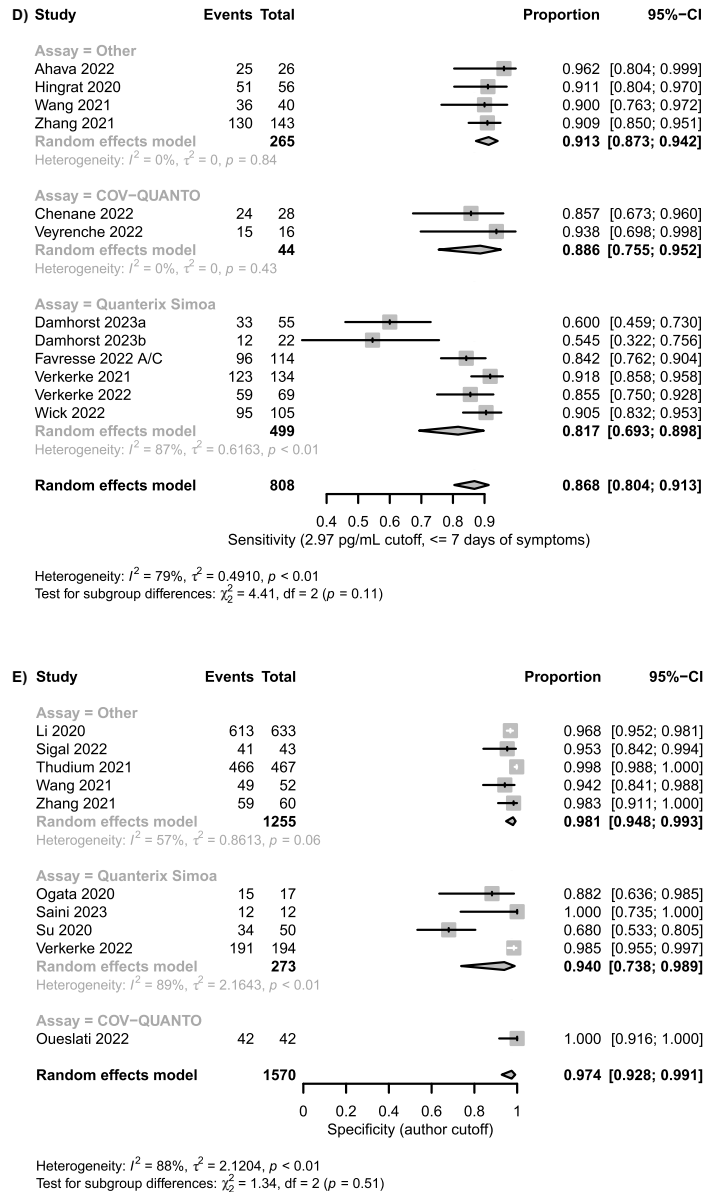

**Figure S3. Alternate meta-analyses of sensitivity and specificity for acute COVID-19.** (A) Sensitivity where the least restrictive parameters where the author's index test cutoff and the author's definition of acute COVID-19 are accepted as published. Additional alternate sensitivity meta-analyses accepted the author's cutoff value for the index test but restricted the case definition to (B) patients with  $\leq 14$  days of symptoms or (C) patients with  $\leq 7$  days of symptoms. (D) Sensitivity using the restrictive index test cutoff only for patients with  $\leq 7$  days of symptoms. (E) Alternate specificity meta-analysis accepting the author's index test cutoff value.



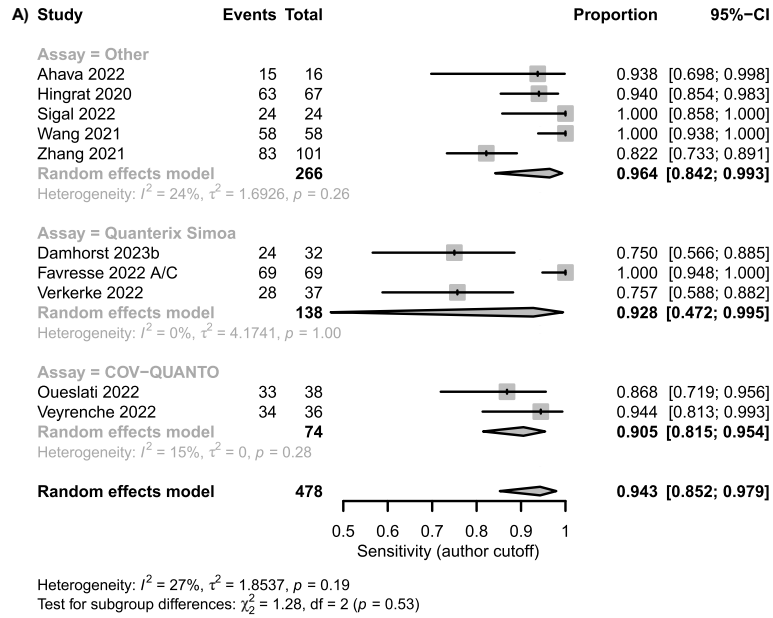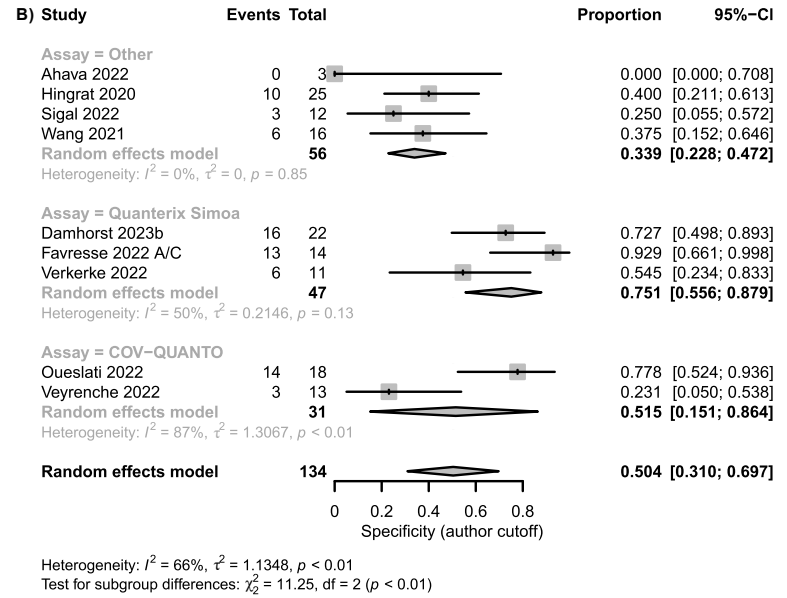

c) Summary ROC curve (bivariate model) for Diagnostic Test Accuracy

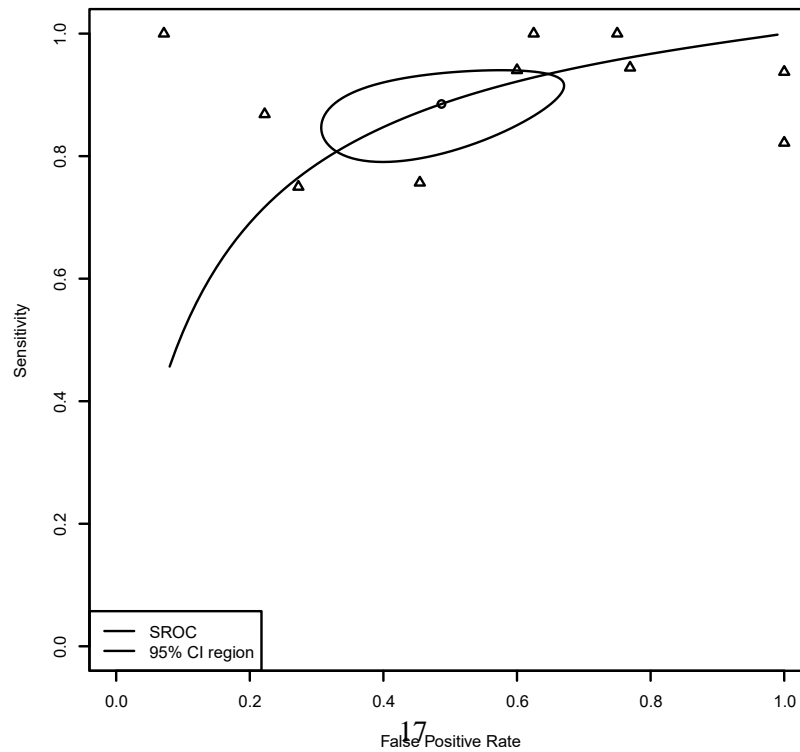

**Figure S4. Alternate meta-analysis of nucleocapsid antigenemia as a diagnostic indicator of nasal swab viral load** using the author's index test cutoff value.

Univariate models for (A) sensitivity and (B) specificity, and (C) summary ROC curve using a bivariate model.

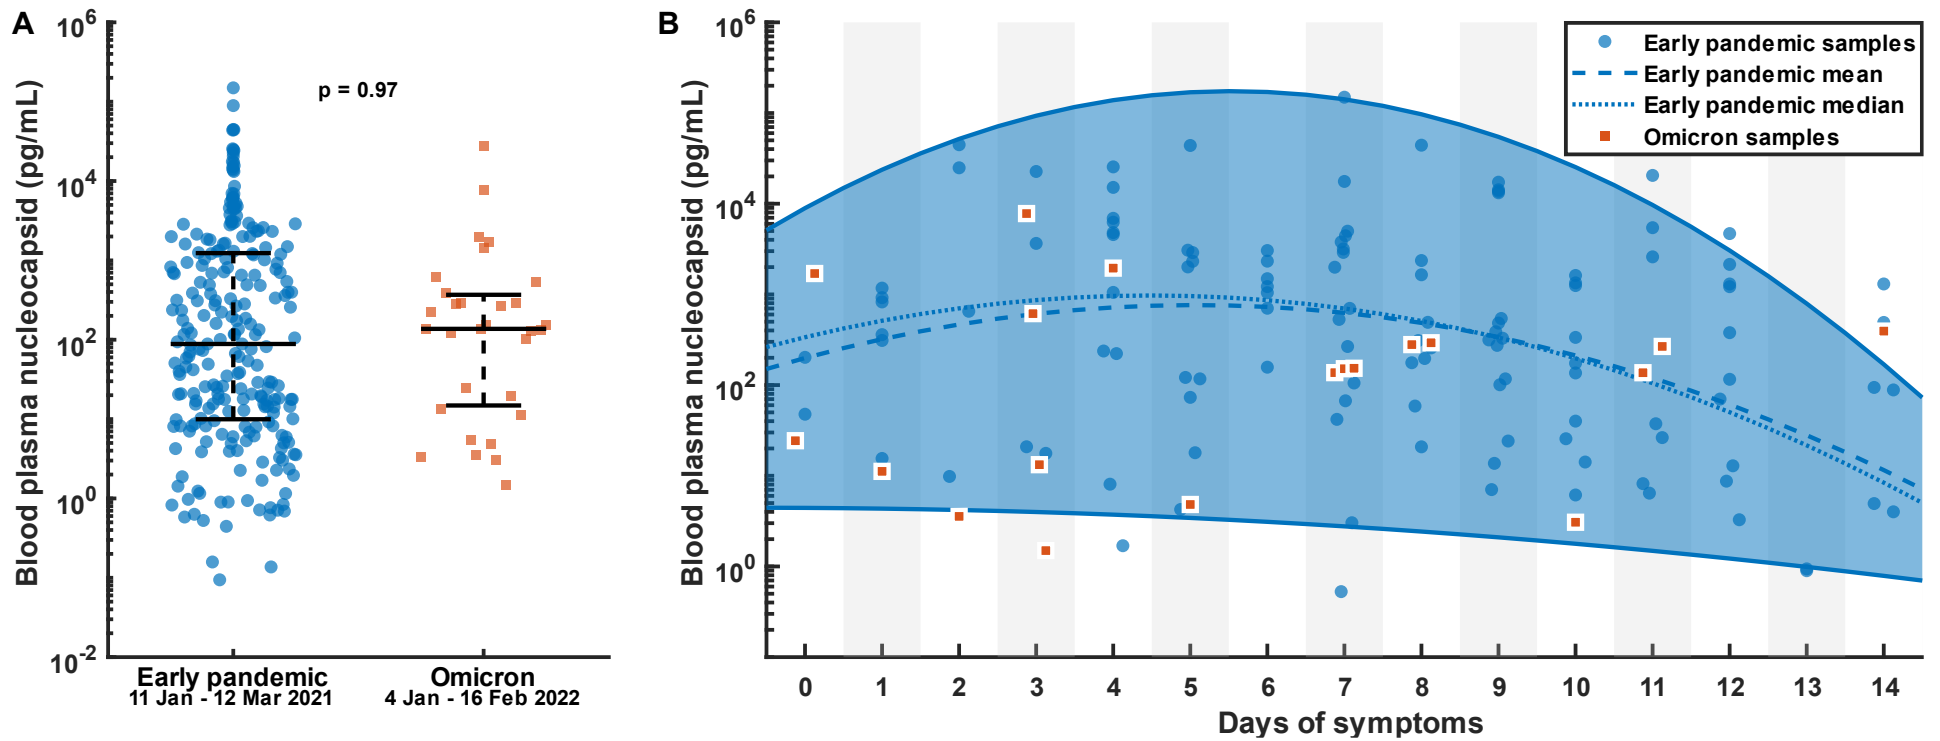

**Figure S5. Omicron era nucleocapsid antigenemia has a similar distribution to early pandemic antigenemia.** (A) Plasma nucleocapsid levels measured during the early pandemic (N = 244, 88.4 pg/mL [IQR 9.9-1235.5]) compared to the Omicron era (N =31, 137.1 pg/mL [IQR 14.8-368.5]) exhibited similar median values and were not significantly different by rank sum test. (B) Data binned by days since symptom onset. Mean, median and standard deviation (SD) of the log antigenemia level were calculated from early pandemic data in each bin. Quadratic regressions were calculated to fit mean, median and mean $\pm$ 1.96\*SD versus time which defined the boundaries of a 95% distribution interval. 16 of 19 (84%) of Omicron era measurements fell within the 95% distribution estimate suggesting they follow a similar distribution pattern but may fall lower than the mean and median of early pandemic levels.

## PRISMA 2020 Checklist

| Section and Topic             | Item # | Checklist item                                                                                                                                                                                                                                                                                       | Location where item is reported |
|-------------------------------|--------|------------------------------------------------------------------------------------------------------------------------------------------------------------------------------------------------------------------------------------------------------------------------------------------------------|---------------------------------|
| <b>TITLE</b>                  |        |                                                                                                                                                                                                                                                                                                      |                                 |
| Title                         | 1      | Identify the report as a systematic review.                                                                                                                                                                                                                                                          | Title                           |
| <b>ABSTRACT</b>               |        |                                                                                                                                                                                                                                                                                                      |                                 |
| Abstract                      | 2      | See the PRISMA 2020 for Abstracts checklist.                                                                                                                                                                                                                                                         | Supplement                      |
| <b>INTRODUCTION</b>           |        |                                                                                                                                                                                                                                                                                                      |                                 |
| Rationale                     | 3      | Describe the rationale for the review in the context of existing knowledge.                                                                                                                                                                                                                          | Introduction                    |
| Objectives                    | 4      | Provide an explicit statement of the objective(s) or question(s) the review addresses.                                                                                                                                                                                                               | Introduction                    |
| <b>METHODS</b>                |        |                                                                                                                                                                                                                                                                                                      |                                 |
| Eligibility criteria          | 5      | Specify the inclusion and exclusion criteria for the review and how studies were grouped for the syntheses.                                                                                                                                                                                          | Methods                         |
| Information sources           | 6      | Specify all databases, registers, websites, organisations, reference lists and other sources searched or consulted to identify studies. Specify the date when each source was last searched or consulted.                                                                                            | Methods                         |
| Search strategy               | 7      | Present the full search strategies for all databases, registers and websites, including any filters and limits used.                                                                                                                                                                                 | Supplement                      |
| Selection process             | 8      | Specify the methods used to decide whether a study met the inclusion criteria of the review, including how many reviewers screened each record and each report retrieved, whether they worked independently, and if applicable, details of automation tools used in the process.                     | Methods                         |
| Data collection process       | 9      | Specify the methods used to collect data from reports, including how many reviewers collected data from each report, whether they worked independently, any processes for obtaining or confirming data from study investigators, and if applicable, details of automation tools used in the process. | Methods                         |
| Data items                    | 10a    | List and define all outcomes for which data were sought. Specify whether all results that were compatible with each outcome domain in each study were sought (e.g. for all measures, time points, analyses), and if not, the methods used to decide which results to collect.                        | Methods                         |
|                               | 10b    | List and define all other variables for which data were sought (e.g. participant and intervention characteristics, funding sources). Describe any assumptions made about any missing or unclear information.                                                                                         | Methods                         |
| Study risk of bias assessment | 11     | Specify the methods used to assess risk of bias in the included studies, including details of the tool(s) used, how many reviewers assessed each study and whether they worked independently, and if applicable, details of automation tools used in the process.                                    | Methods                         |
| Effect measures               | 12     | Specify for each outcome the effect measure(s) (e.g. risk ratio, mean difference) used in the synthesis or presentation of results.                                                                                                                                                                  | Methods                         |
| Synthesis methods             | 13a    | Describe the processes used to decide which studies were eligible for each synthesis (e.g. tabulating the study intervention characteristics and comparing against the planned groups for each synthesis (item #5)).                                                                                 | Methods                         |
|                               | 13b    | Describe any methods required to prepare the data for presentation or synthesis, such as handling of missing summary statistics, or data conversions.                                                                                                                                                | Methods                         |
|                               | 13c    | Describe any methods used to tabulate or visually display results of individual studies and syntheses.                                                                                                                                                                                               | Methods                         |
|                               | 13d    | Describe any methods used to synthesize results and provide a rationale for the choice(s). If meta-analysis was performed, describe the model(s), method(s) to identify the presence and extent of statistical heterogeneity, and software package(s) used.                                          | Methods                         |
|                               | 13e    | Describe any methods used to explore possible causes of heterogeneity among study results (e.g. subgroup analysis, meta-regression).                                                                                                                                                                 | N/A                             |
|                               | 13f    | Describe any sensitivity analyses conducted to assess robustness of the synthesized results.                                                                                                                                                                                                         | N/A                             |

| Section and Topic             | Item # | Checklist item                                                                                                                                                                                                                                                                       | Location where item is reported |
|-------------------------------|--------|--------------------------------------------------------------------------------------------------------------------------------------------------------------------------------------------------------------------------------------------------------------------------------------|---------------------------------|
| Reporting bias assessment     | 14     | Describe any methods used to assess risk of bias due to missing results in a synthesis (arising from reporting biases).                                                                                                                                                              | Methods                         |
| Certainty assessment          | 15     | Describe any methods used to assess certainty (or confidence) in the body of evidence for an outcome.                                                                                                                                                                                | Methods                         |
| <b>RESULTS</b>                |        |                                                                                                                                                                                                                                                                                      |                                 |
| Study selection               | 16a    | Describe the results of the search and selection process, from the number of records identified in the search to the number of studies included in the review, ideally using a flow diagram.                                                                                         | Results                         |
|                               | 16b    | Cite studies that might appear to meet the inclusion criteria, but which were excluded, and explain why they were excluded.                                                                                                                                                          | Results                         |
| Study characteristics         | 17     | Cite each included study and present its characteristics.                                                                                                                                                                                                                            | Table 1                         |
| Risk of bias in studies       | 18     | Present assessments of risk of bias for each included study.                                                                                                                                                                                                                         | Table 2                         |
| Results of individual studies | 19     | For all outcomes, present, for each study: (a) summary statistics for each group (where appropriate) and (b) an effect estimate and its precision (e.g. confidence/credible interval), ideally using structured tables or plots.                                                     | Figs 2 and 3                    |
| Results of syntheses          | 20a    | For each synthesis, briefly summarise the characteristics and risk of bias among contributing studies.                                                                                                                                                                               | Table 2, Table S6               |
|                               | 20b    | Present results of all statistical syntheses conducted. If meta-analysis was done, present for each the summary estimate and its precision (e.g. confidence/credible interval) and measures of statistical heterogeneity. If comparing groups, describe the direction of the effect. | Figs 2 and 3                    |
|                               | 20c    | Present results of all investigations of possible causes of heterogeneity among study results.                                                                                                                                                                                       | N/A                             |
|                               | 20d    | Present results of all sensitivity analyses conducted to assess the robustness of the synthesized results.                                                                                                                                                                           | N/A                             |
| Reporting biases              | 21     | Present assessments of risk of bias due to missing results (arising from reporting biases) for each synthesis assessed.                                                                                                                                                              | N/A                             |
| Certainty of evidence         | 22     | Present assessments of certainty (or confidence) in the body of evidence for each outcome assessed.                                                                                                                                                                                  | Figs 2 and 3                    |
| <b>DISCUSSION</b>             |        |                                                                                                                                                                                                                                                                                      |                                 |
| Discussion                    | 23a    | Provide a general interpretation of the results in the context of other evidence.                                                                                                                                                                                                    | Discussion                      |
|                               | 23b    | Discuss any limitations of the evidence included in the review.                                                                                                                                                                                                                      | Discussion                      |
|                               | 23c    | Discuss any limitations of the review processes used.                                                                                                                                                                                                                                | Discussion                      |
|                               | 23d    | Discuss implications of the results for practice, policy, and future research.                                                                                                                                                                                                       | Discussion                      |
| <b>OTHER INFORMATION</b>      |        |                                                                                                                                                                                                                                                                                      |                                 |
| Registration and protocol     | 24a    | Provide registration information for the review, including register name and registration number, or state that the review was not registered.                                                                                                                                       | Methods                         |
|                               | 24b    | Indicate where the review protocol can be accessed, or state that a protocol was not prepared.                                                                                                                                                                                       | Methods                         |
|                               | 24c    | Describe and explain any amendments to information provided at registration or in the protocol.                                                                                                                                                                                      | N/A                             |
| Support                       | 25     | Describe sources of financial or non-financial support for the review, and the role of the funders or sponsors in the review.                                                                                                                                                        | Methods                         |
| Competing                     | 26     | Declare any competing interests of review authors.                                                                                                                                                                                                                                   | Acknowled-                      |

| Section and Topic                              | Item # | Checklist item                                                                                                                                                                                                                             | Location where item is reported |
|------------------------------------------------|--------|--------------------------------------------------------------------------------------------------------------------------------------------------------------------------------------------------------------------------------------------|---------------------------------|
| interests                                      |        |                                                                                                                                                                                                                                            | gements                         |
| Availability of data, code and other materials | 27     | Report which of the following are publicly available and where they can be found: template data collection forms; data extracted from included studies; data used for all analyses; analytic code; any other materials used in the review. | Acknowledgements                |

From: Page MJ, McKenzie JE, Bossuyt PM, Boutron I, Hoffmann TC, Mulrow CD, et al. The PRISMA 2020 statement: an updated guideline for reporting systematic reviews. *BMJ* 2021;372:n71. doi: 10.1136/bmj.n71

For more information, visit: <http://www.prisma-statement.org/>

## PRISMA 2020 for Abstracts Checklist

| Section and Topic       | Item # | Checklist item                                                                                                                                                                                                                                                                                        | Reported (Yes/No) |
|-------------------------|--------|-------------------------------------------------------------------------------------------------------------------------------------------------------------------------------------------------------------------------------------------------------------------------------------------------------|-------------------|
| <b>TITLE</b>            |        |                                                                                                                                                                                                                                                                                                       |                   |
| Title                   | 1      | Identify the report as a systematic review.                                                                                                                                                                                                                                                           | Yes               |
| <b>BACKGROUND</b>       |        |                                                                                                                                                                                                                                                                                                       |                   |
| Objectives              | 2      | Provide an explicit statement of the main objective(s) or question(s) the review addresses.                                                                                                                                                                                                           | Yes               |
| <b>METHODS</b>          |        |                                                                                                                                                                                                                                                                                                       |                   |
| Eligibility criteria    | 3      | Specify the inclusion and exclusion criteria for the review.                                                                                                                                                                                                                                          | Yes               |
| Information sources     | 4      | Specify the information sources (e.g. databases, registers) used to identify studies and the date when each was last searched.                                                                                                                                                                        | Yes               |
| Risk of bias            | 5      | Specify the methods used to assess risk of bias in the included studies.                                                                                                                                                                                                                              | Yes               |
| Synthesis of results    | 6      | Specify the methods used to present and synthesise results.                                                                                                                                                                                                                                           | Yes               |
| <b>RESULTS</b>          |        |                                                                                                                                                                                                                                                                                                       |                   |
| Included studies        | 7      | Give the total number of included studies and participants and summarise relevant characteristics of studies.                                                                                                                                                                                         | Yes               |
| Synthesis of results    | 8      | Present results for main outcomes, preferably indicating the number of included studies and participants for each. If meta-analysis was done, report the summary estimate and confidence/credible interval. If comparing groups, indicate the direction of the effect (i.e. which group is favoured). | Yes               |
| <b>DISCUSSION</b>       |        |                                                                                                                                                                                                                                                                                                       |                   |
| Limitations of evidence | 9      | Provide a brief summary of the limitations of the evidence included in the review (e.g. study risk of bias, inconsistency and imprecision).                                                                                                                                                           | Yes               |
| Interpretation          | 10     | Provide a general interpretation of the results and important implications.                                                                                                                                                                                                                           | Yes               |
| <b>OTHER</b>            |        |                                                                                                                                                                                                                                                                                                       |                   |
| Funding                 | 11     | Specify the primary source of funding for the review.                                                                                                                                                                                                                                                 | Yes               |
| Registration            | 12     | Provide the register name and registration number.                                                                                                                                                                                                                                                    | No                |

From: Page MJ, McKenzie JE, Bossuyt PM, Boutron I, Hoffmann TC, Mulrow CD, et al. The PRISMA 2020 statement: an updated guideline for reporting systematic reviews. *BMJ* 2021;372:n71. doi: 10.1136/bmj.n71

For more information, visit: <http://www.prisma-statement.org/>

**Data extraction template**

|           |                 | <i>mm/dd/yyyy</i> | <i>mm/dd/yyyy</i> |              | #                   | Definition of a case |                      |                        |                | <i>y/n</i>          |
|-----------|-----------------|-------------------|-------------------|--------------|---------------------|----------------------|----------------------|------------------------|----------------|---------------------|
| <b>Yr</b> | <b>Location</b> | <b>Date_start</b> | <b>Date_end</b>   | <b>Assay</b> | <b>Cutoff_pg_ml</b> | <b>RT-PCR+</b>       | <b>Days_from_pos</b> | <b>Days_from_sympt</b> | <b>Comment</b> | <b>By_sympt_day</b> |
|           |                 |                   |                   |              |                     |                      |                      |                        |                |                     |

|                  | <i># total</i>  | <i># pos</i>     | <i># neg</i>     |                  | <i># total</i>   | <i># pos</i>      | <i># neg</i>      | <i># total</i> | <i># pos</i>  | <i># neg</i>  | <i>Case source</i> |
|------------------|-----------------|------------------|------------------|------------------|------------------|-------------------|-------------------|----------------|---------------|---------------|--------------------|
| <b>Cutoff_d1</b> | <b>Cases_7d</b> | <b>Ag_pos_7d</b> | <b>Ag_neg_7d</b> | <b>Cutoff_d2</b> | <b>Cases_14d</b> | <b>Ag_pos_14d</b> | <b>Ag_neg_14d</b> | <b>Cases</b>   | <b>Ag_pos</b> | <b>Ag_neg</b> |                    |
|                  |                 |                  |                  |                  |                  |                   |                   |                |               |               |                    |

| <u>Define control</u> | <i># total</i> | <i># pos</i>    | <i># neg</i>       |                    | <i># total</i>      | <i># pos</i>     | <i># neg</i>     |
|-----------------------|----------------|-----------------|--------------------|--------------------|---------------------|------------------|------------------|
| <b>RT-PCR-</b>        | <b>Comment</b> | <b>Controls</b> | <b>Ag_pos_ctrl</b> | <b>Ag_neg_ctrl</b> | <b>Pre-pandemic</b> | <b>Ag_pos_PP</b> | <b>Ag_neg_PP</b> |
|                       |                |                 |                    |                    |                     |                  |                  |

| <i>y/n</i>              | <i>y/n</i>   | <i># total</i>  | <i># pos</i>       | <i># neg</i>       | <i># total</i>  | <i># pos</i>       | <i># neg</i>       | <i>Ct source</i> |
|-------------------------|--------------|-----------------|--------------------|--------------------|-----------------|--------------------|--------------------|------------------|
| <b>Paired_sample_24</b> | <b>Ct_33</b> | <b>Pts_LT33</b> | <b>Ag_pos_LT33</b> | <b>Ag_neg_LT33</b> | <b>Pts_GT33</b> | <b>Ag_pos_GT33</b> | <b>Ag_neg_GT33</b> |                  |
|                         |              |                 |                    |                    |                 |                    |                    |                  |
